# Supplementary material
Source: Springer Nature journal article supplement (https://www.springermedizin.de/resource/supplementary/12955_2013_1326_MOESM2_ESM.pdf/9559574)
Supplement: MOESM2 [file 9559574]

**Pearson's correlations among all the scales assessed for the group < 18 years old**

|                                   | <b>SAQApp</b> | <b>QLPSDb<br/>i</b> | <b>Self-<br/>Image<br/>SRS-<br/>22</b> | <b>SAQ<br/>expect</b> | <b>Function<br/>SRS22</b> | <b>Pain<br/>SRS22</b> | <b>Mental<br/>Health<br/>SRS22</b> |
|-----------------------------------|---------------|---------------------|----------------------------------------|-----------------------|---------------------------|-----------------------|------------------------------------|
| <b>TAPS</b>                       | -.80**        | -.30*               | .25                                    | -.44**                | .08                       | .60                   | .01                                |
| <b>SAQ.App</b>                    |               | .55**               | -.51**                                 | .48**                 | -.40**                    | -.21                  | -.15                               |
| <b>QLPSD-bi</b>                   |               |                     | -.81**                                 | .61**                 | -.50**                    | -.10                  | -.46**                             |
| <b>Self-<br/>Image<br/>SRS-22</b> |               |                     |                                        | -.60**                | .52**                     | .22                   | .43**                              |
| <b>SAQ.exp</b>                    |               |                     |                                        |                       | -.25                      | -.16                  | -.14                               |
| <b>Function<br/>srs-22</b>        |               |                     |                                        |                       |                           | .70**                 | .56**                              |
| <b>Pain SRS-<br/>22</b>           |               |                     |                                        |                       |                           |                       | .29                                |

\*  $\alpha < 0.05$

\*\*  $\alpha < 0.01$

**Pearson's correlations among all the scales assessed for the group  $\geq 18$  years old**

|                                   | <b>SAQApp</b> | <b>QLPSDb<br/>i</b> | <b>Self-<br/>Image<br/>SRS-<br/>22</b> | <b>SAQ<br/>expect</b> | <b>Function<br/>SRS22</b> | <b>Pain<br/>SRS22</b> | <b>Mental<br/>Health<br/>SRS22</b> |
|-----------------------------------|---------------|---------------------|----------------------------------------|-----------------------|---------------------------|-----------------------|------------------------------------|
| <b>TAPS</b>                       | -.71**        | -.35*               | .53**                                  | -.33                  | .65**                     | .44**                 | .23                                |
| <b>SAQ.App</b>                    |               | .65**               | -.76**                                 | .43*                  | -.64**                    | -.49**                | -.48**                             |
| <b>QLPSD-bi</b>                   |               |                     | -.70**                                 | .63**                 | -.50**                    | -.16                  | -.41*                              |
| <b>Self-<br/>Image<br/>SRS-22</b> |               |                     |                                        | -.76**                | .72**                     | .55**                 | .62**                              |
| <b>SAQ.exp</b>                    |               |                     |                                        |                       | -.38*                     | -.36*                 | -.30                               |
| <b>Function<br/>srs-22</b>        |               |                     |                                        |                       |                           | .76**                 | .53**                              |
| <b>Pain SRS-<br/>22</b>           |               |                     |                                        |                       |                           |                       | .56**                              |

\*  $\alpha < 0.05$

\*\*  $\alpha < 0.01$
